# Supplementary material
Source: PubMed Central journal article supplement (PMC3876400)
Supplement: hesr0048-2037-SD1.pdf [file hesr0048-2037-SD1.pdf]

Appendix Table 1. Linear probability regression of EHR adoption among U.S. ambulatory health care sites

|                                           | Coefficient      | Standard Error |
|-------------------------------------------|------------------|----------------|
| Number of providers at site               |                  |                |
| 1                                         | --- <sup>a</sup> |                |
| 2                                         | 0.070 ***        | 0.002          |
| 3-5                                       | 0.123 ***        | 0.003          |
| 6-10                                      | 0.183 ***        | 0.004          |
| 11 or more                                | 0.226 ***        | 0.005          |
| Site is part of multi-site group practice |                  |                |
| No                                        | --- <sup>a</sup> |                |
| Yes, 10 or fewer providers in group       | 0.058 ***        | 0.005          |
| Yes, >10 providers in group               | 0.159 ***        | 0.003          |
| Providers at site                         |                  |                |
| Physicians only                           | --- <sup>a</sup> |                |
| Physicians and NPs or PAs                 | 0.068 ***        | 0.002          |
| NPs or PAs only                           | -0.071 ***       | 0.009          |
| Provider specialty mix at site            |                  |                |
| Specialist providers only                 | --- <sup>a</sup> |                |
| Primary care providers only               | 0.063 ***        | 0.002          |
| Mixed primary care and specialists        | 0.035 ***        | 0.004          |
| Site is owned by a hospital               |                  |                |
| No                                        | --- <sup>a</sup> |                |
| Yes                                       | 0.049 ***        | 0.003          |
| Site is affiliated with a health system   |                  |                |
| No                                        | --- <sup>a</sup> |                |
| Yes                                       | 0.038 ***        | 0.003          |
| Variance of PUMA random effect            | 0.063 +++        | 0.001          |
| N                                         |                  |                |
| Sites                                     | 261,973          |                |
| PUMAs                                     | 2,068            |                |

<sup>a</sup> Reference category.

\*\*\*Coefficient estimate statistically different from zero at  $p < 0.001$ .

+++ Likelihood ratio test of random effects versus linear regression statistically significant at  $p < 0.001$ .
